# Supplementary material
Source: PubMed Central journal article supplement (PMC9804308)
Supplement: FEB2-596-2781-s001.pdf [file FEB2-596-2781-s001.pdf]

# Supplementary Figure 1

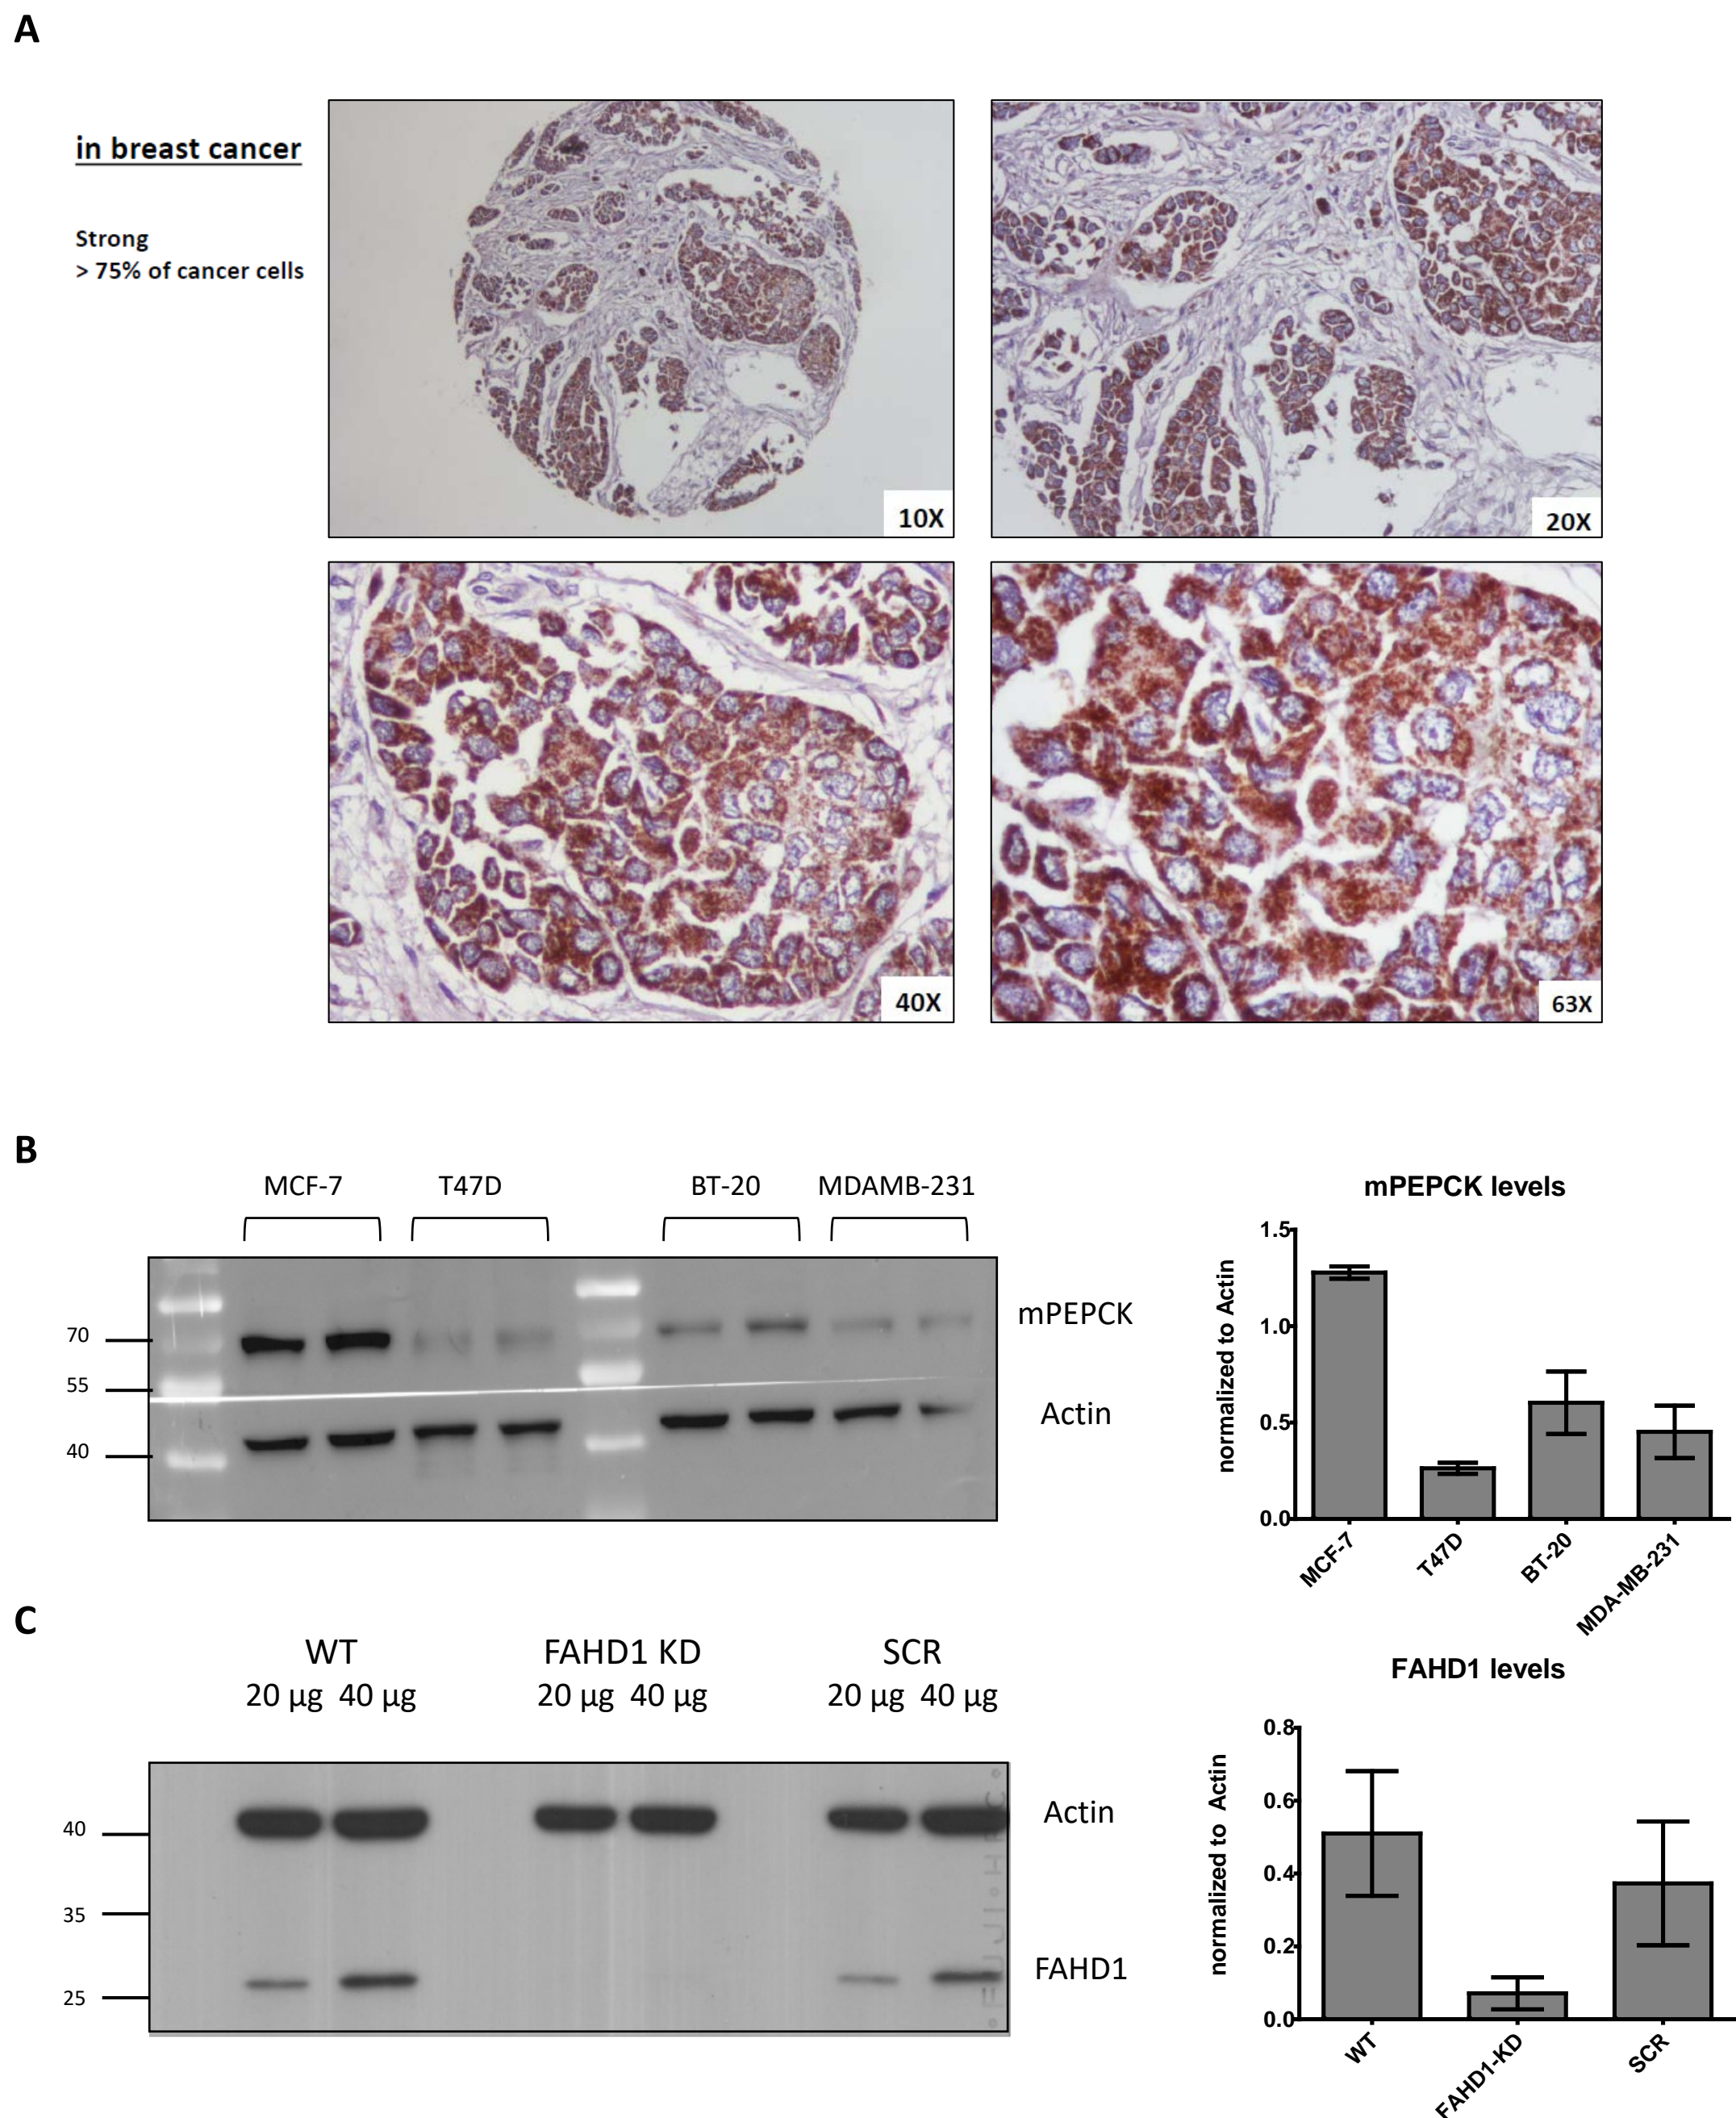

**Supplementary Figure 1. Expression of FAHD1 in breast cancer tissue and verification of regular FAHD1 levels in control cells.**

**A)** The abundance of FAHD1 in breast cancer tissue from patient samples were analyzed by immuno-histochemical staining and confirmed high levels of FAHD1 in malignant tissue. **B)** Mitochondrial PEPCCK expression in breast cancer cell lines analyzed by Western Blot **C)** Western blot analysis of infected MCF-7 cells shows similar FAHD1 levels in uninfected (WT) and control (SCR) cells while FAHD1 KD cells do not express the enzyme at physiological levels.

## Supplementary Figure 2

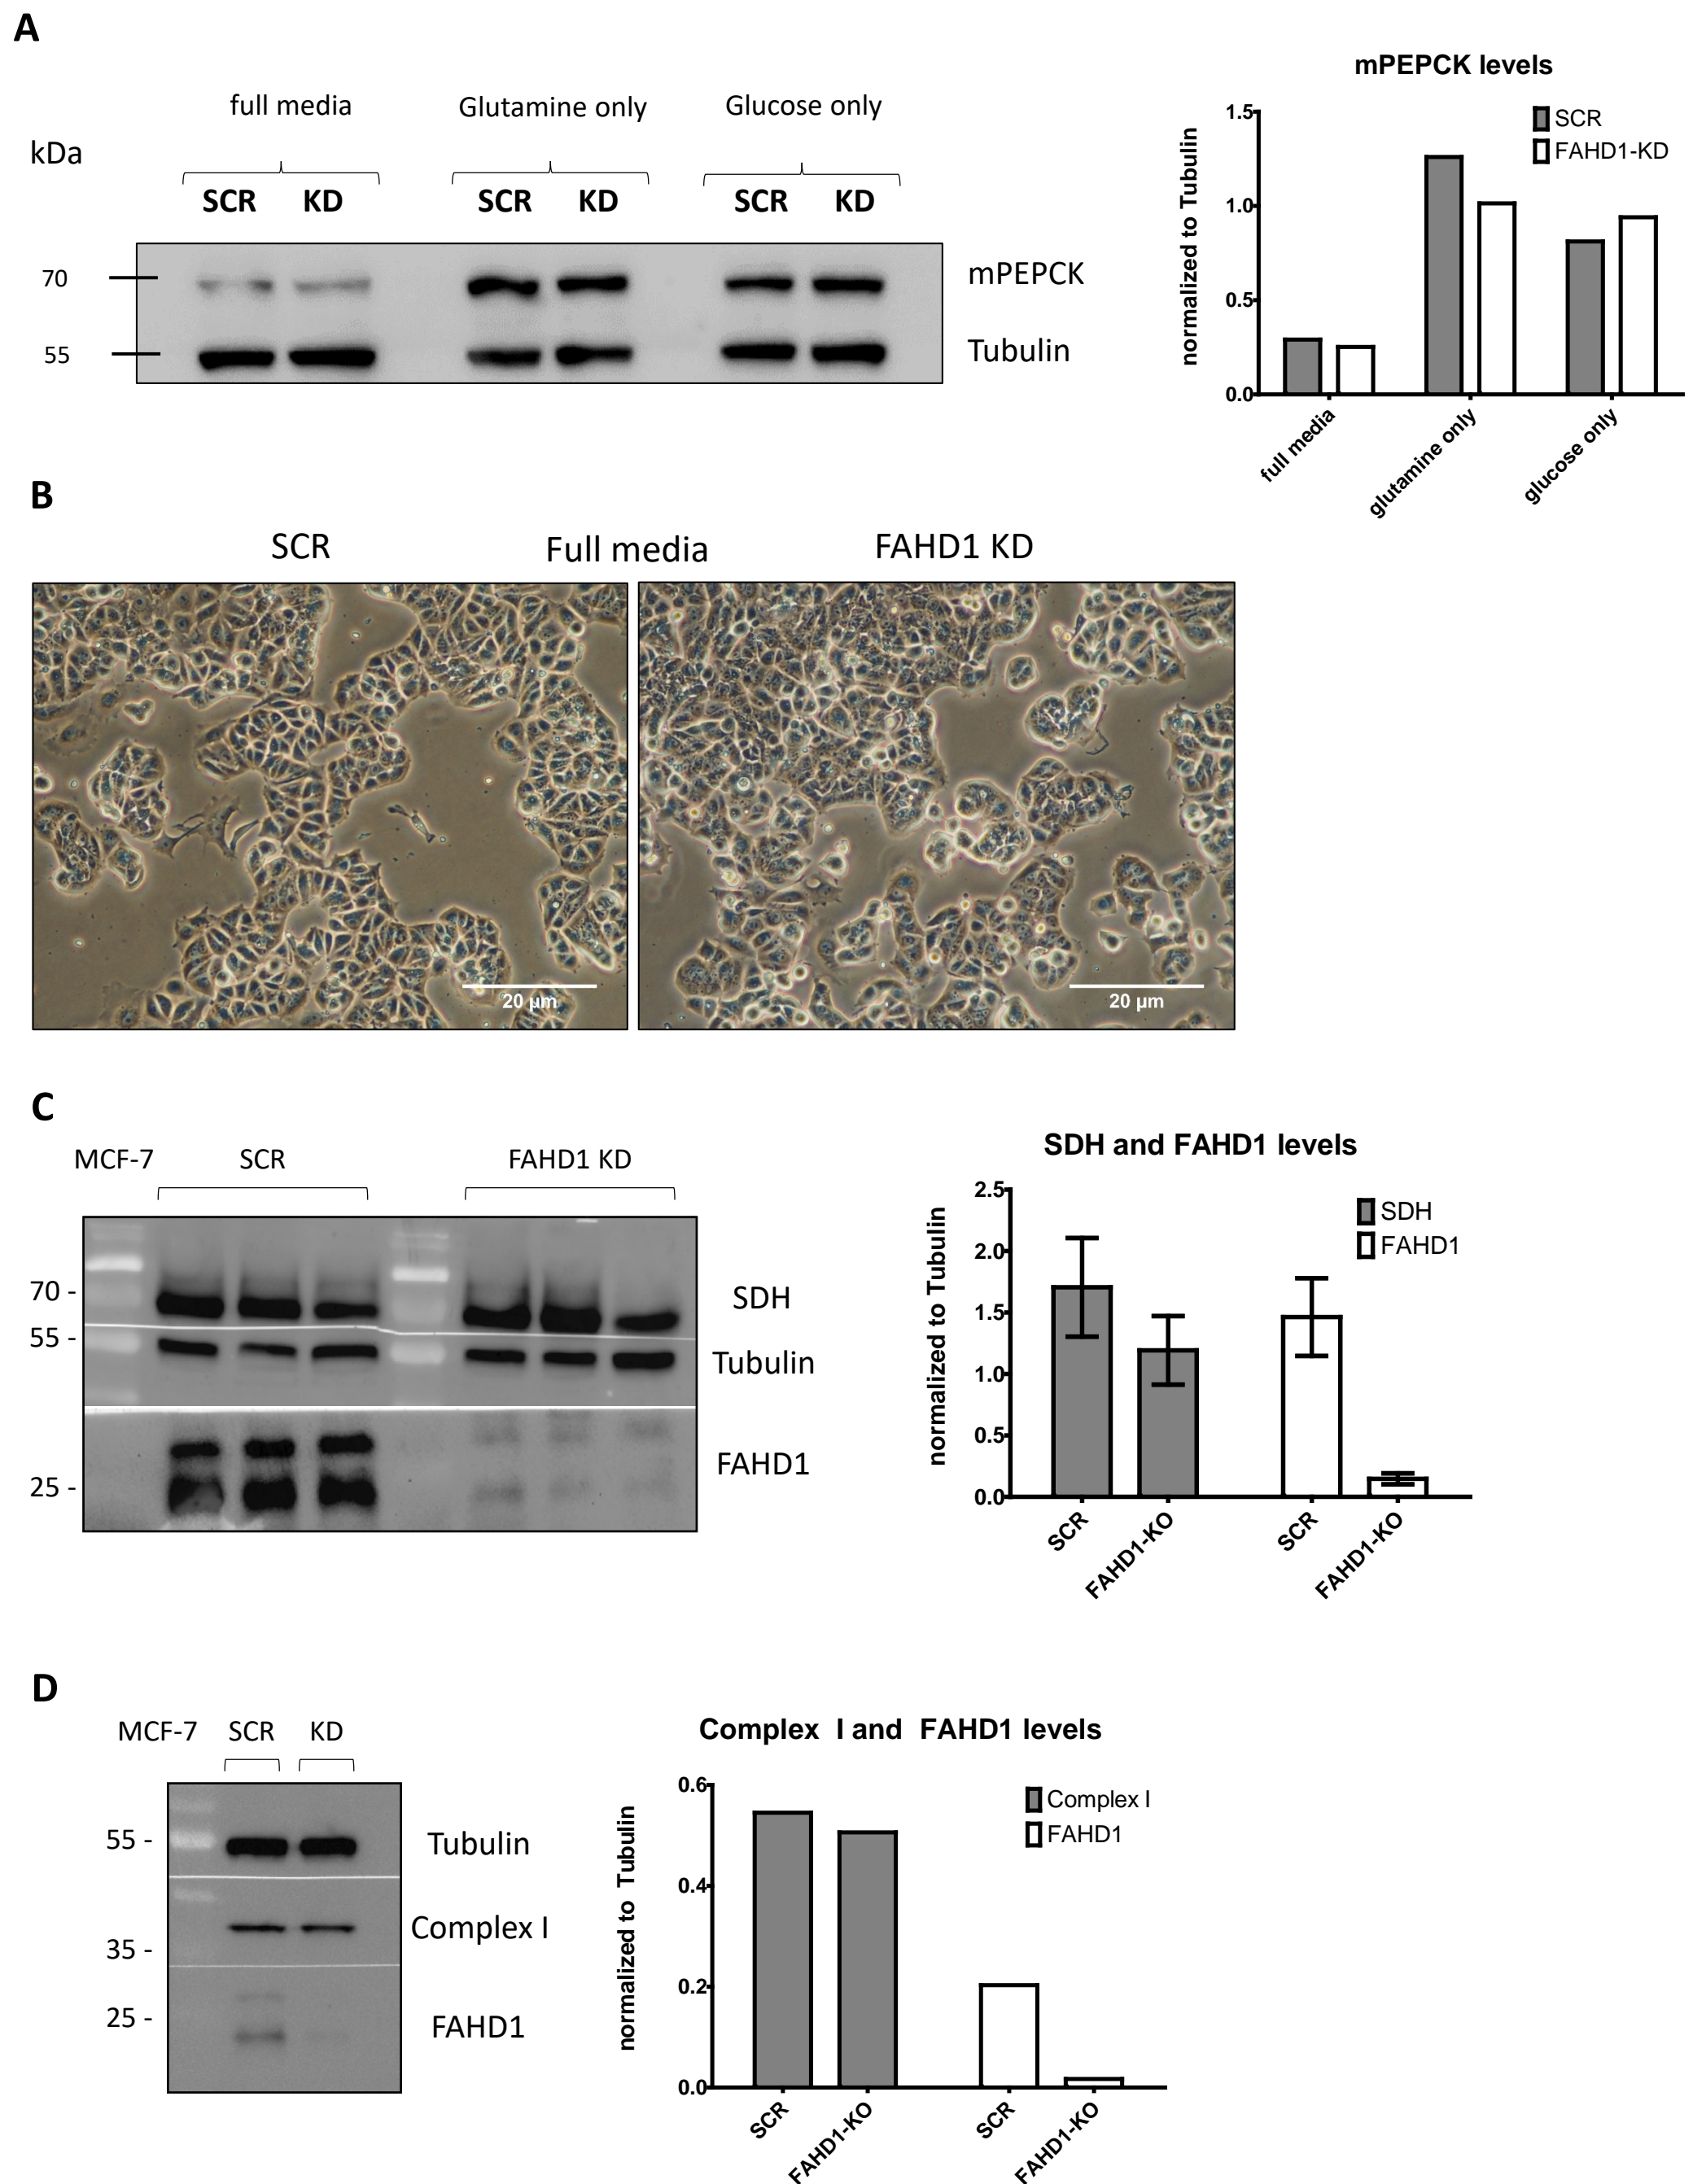

### Supplementary Figure 2. MCF-7 cells cultivated in limiting conditions and in full media

**A)** Western blot depicting upregulation of mPEPCK in MCF-7 cells under limiting conditions such as *glutamine only* or *glucose only* media. **B)** MCF-7 cultured in regular media containing glucose and glutamine (*full media*) with no apparent morphological alterations. **C)** Protein levels of succinate dehydrogenase (SDH, mitochondrial complex II) were analyzed in control (SCR) and FAHD1 KD MCF-7 cells *via* western blot. **D)** Expression levels of NADH:ubiquinone-oxidoreductase (mitochondrial complex I, *NDUFA9*) were analyzed in SCR and FAHD1 KD MCF-7 cells.

# Supplementary Figure 3

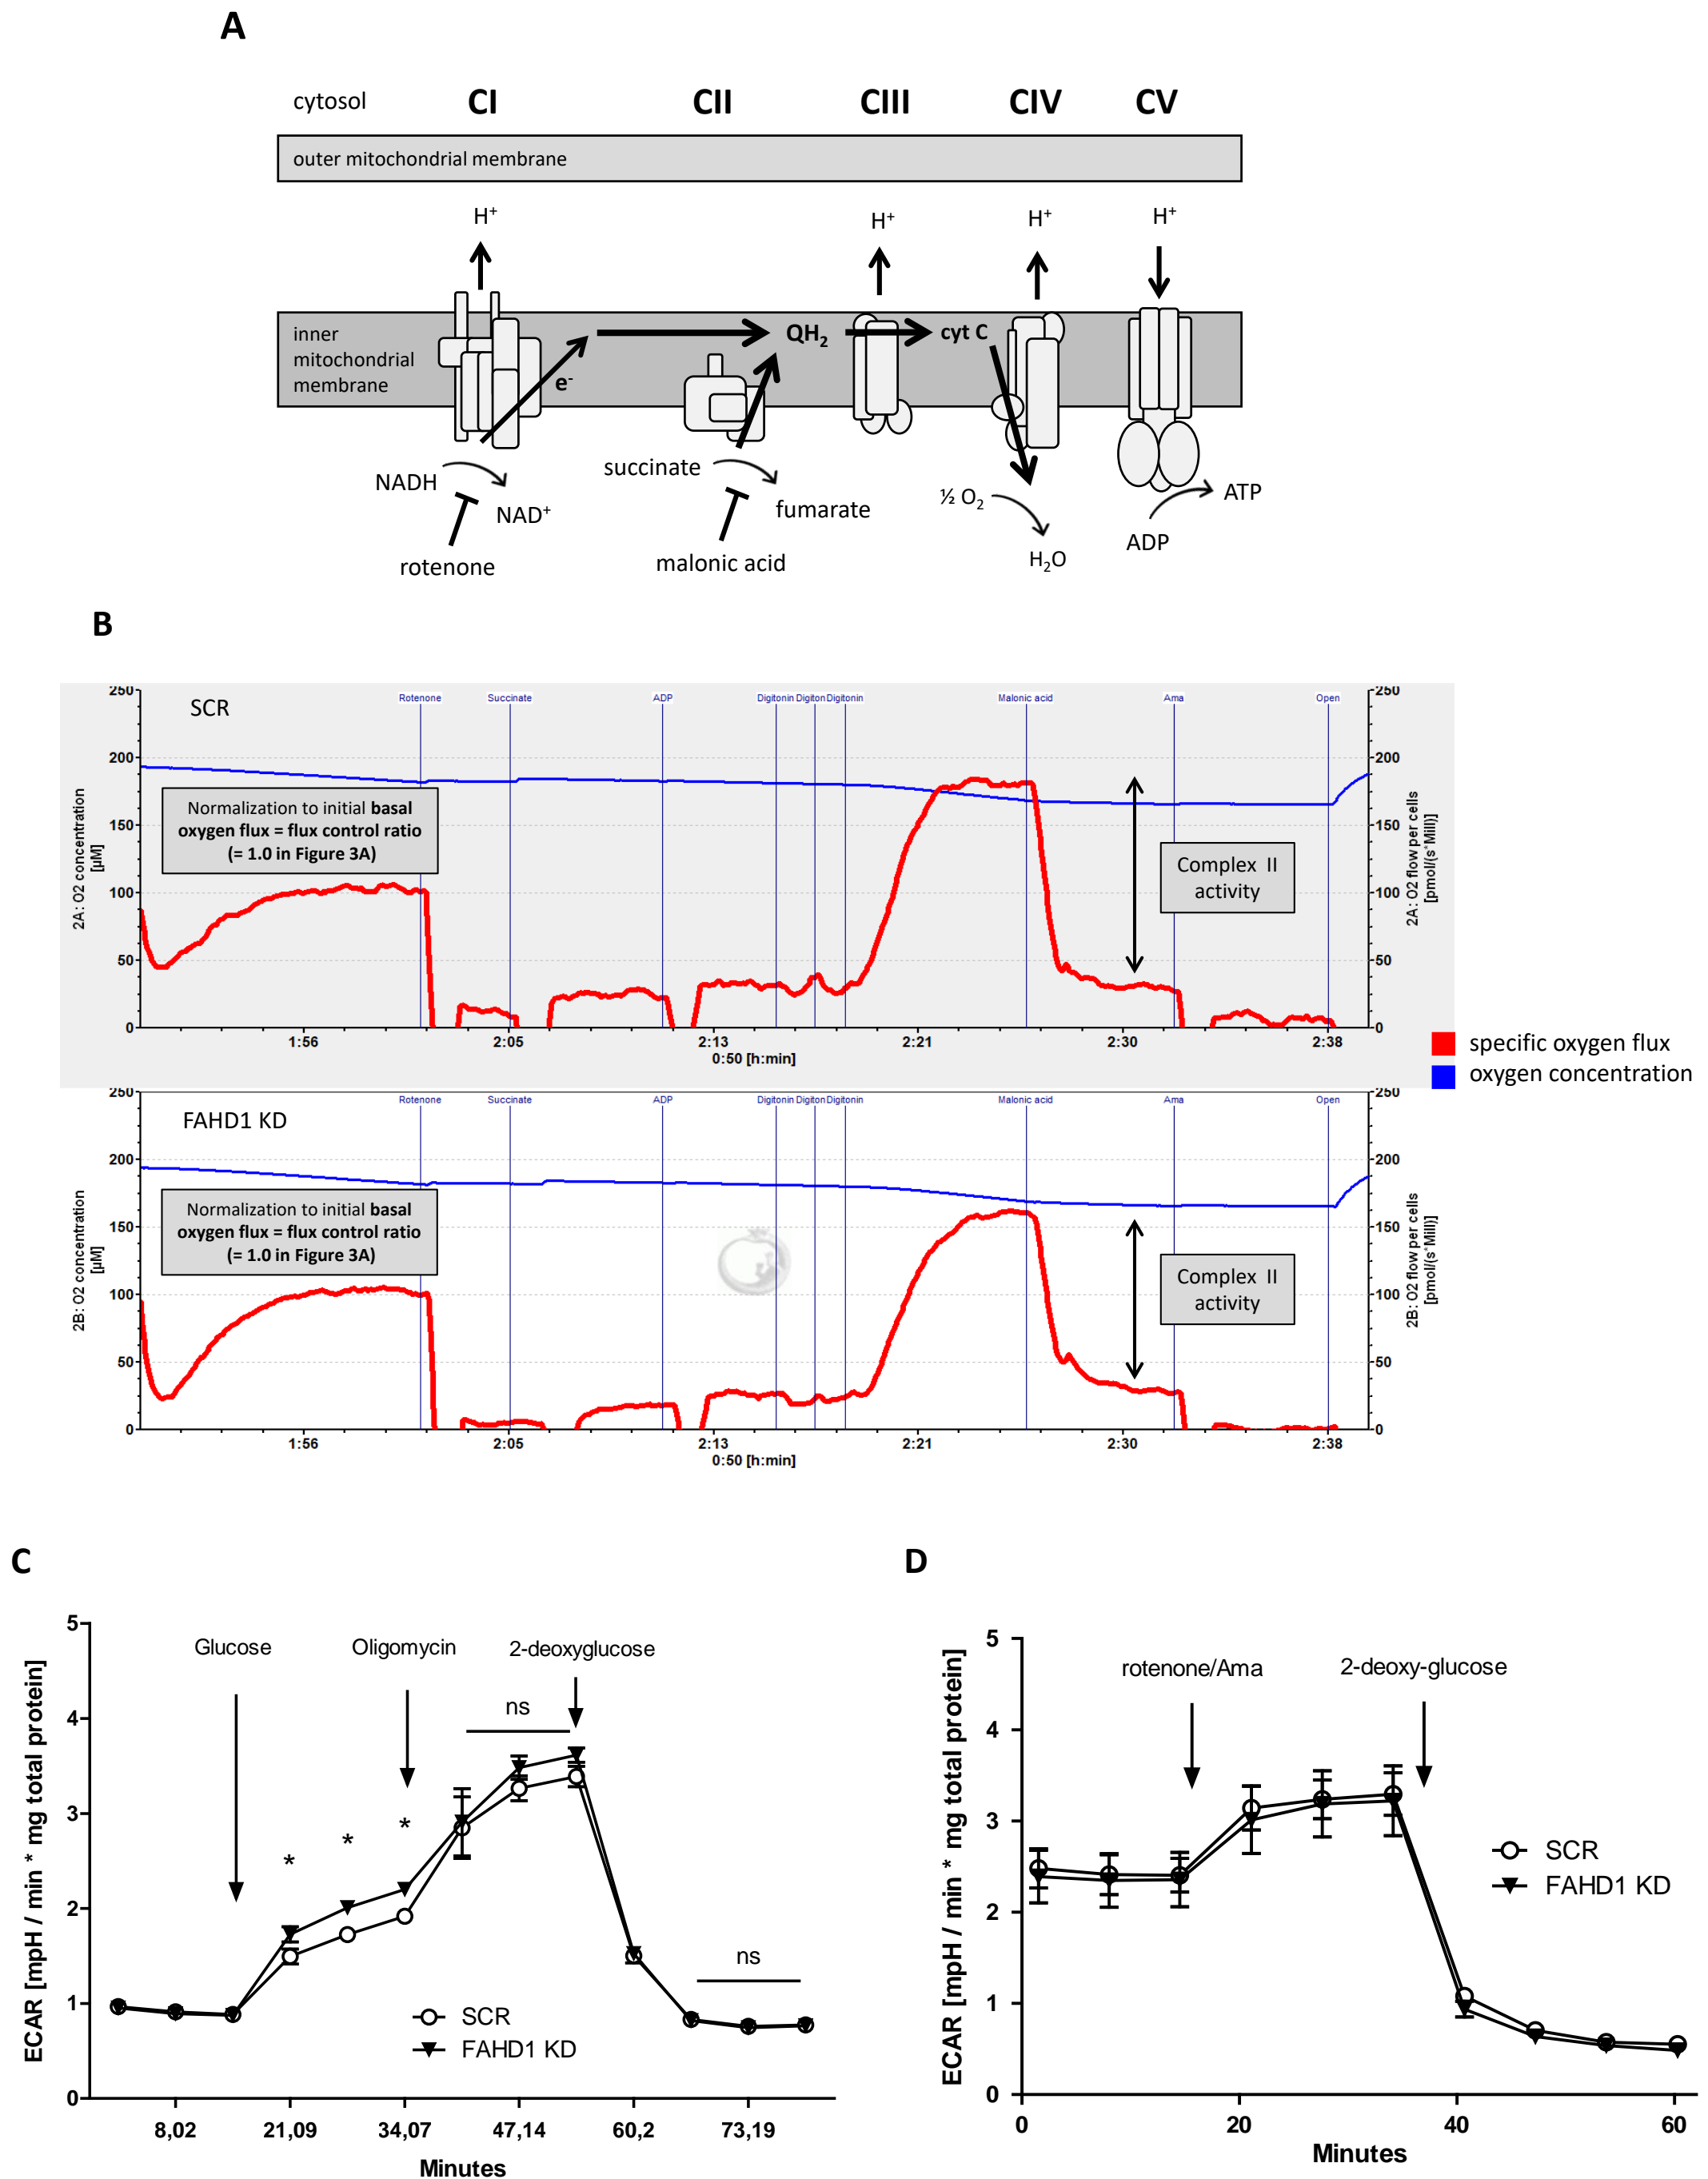

## Supplementary Figure 3. High resolution respirometry for complex II activity

**A)** Schematic overview of the way of action for the compounds and substrates that were added during the measurement in the *Oxygraph-2k*. Details can be found at [bioblast.at](http://bioblast.at) (SUIT-010) showing the respiratory states which were analyzed during high resolution respirometry. **B)** Representative measurement of MCF-7 breast cancer cells in *full media* showing absolute values for oxygen flux in the *Oxygraph-2k*. **C)** Absolute extracellular acidification rates (ECAR) in MCF-7 during the *glycolytic stress test* in the *Seahorse HS Mini*;  $n = 6$  with SEM. **D)** *Glycolytic rate assay* with MDA-MB-231 cells in the *Seahorse HS Mini*;  $n = 3$  with SEM. Significance threshold for students t-test: \*  $p \leq 0.05$ ; \*\*  $p \leq 0.01$ ; \*\*\*  $p \leq 0.001$

## Supplementary Figure 4 – Part 1

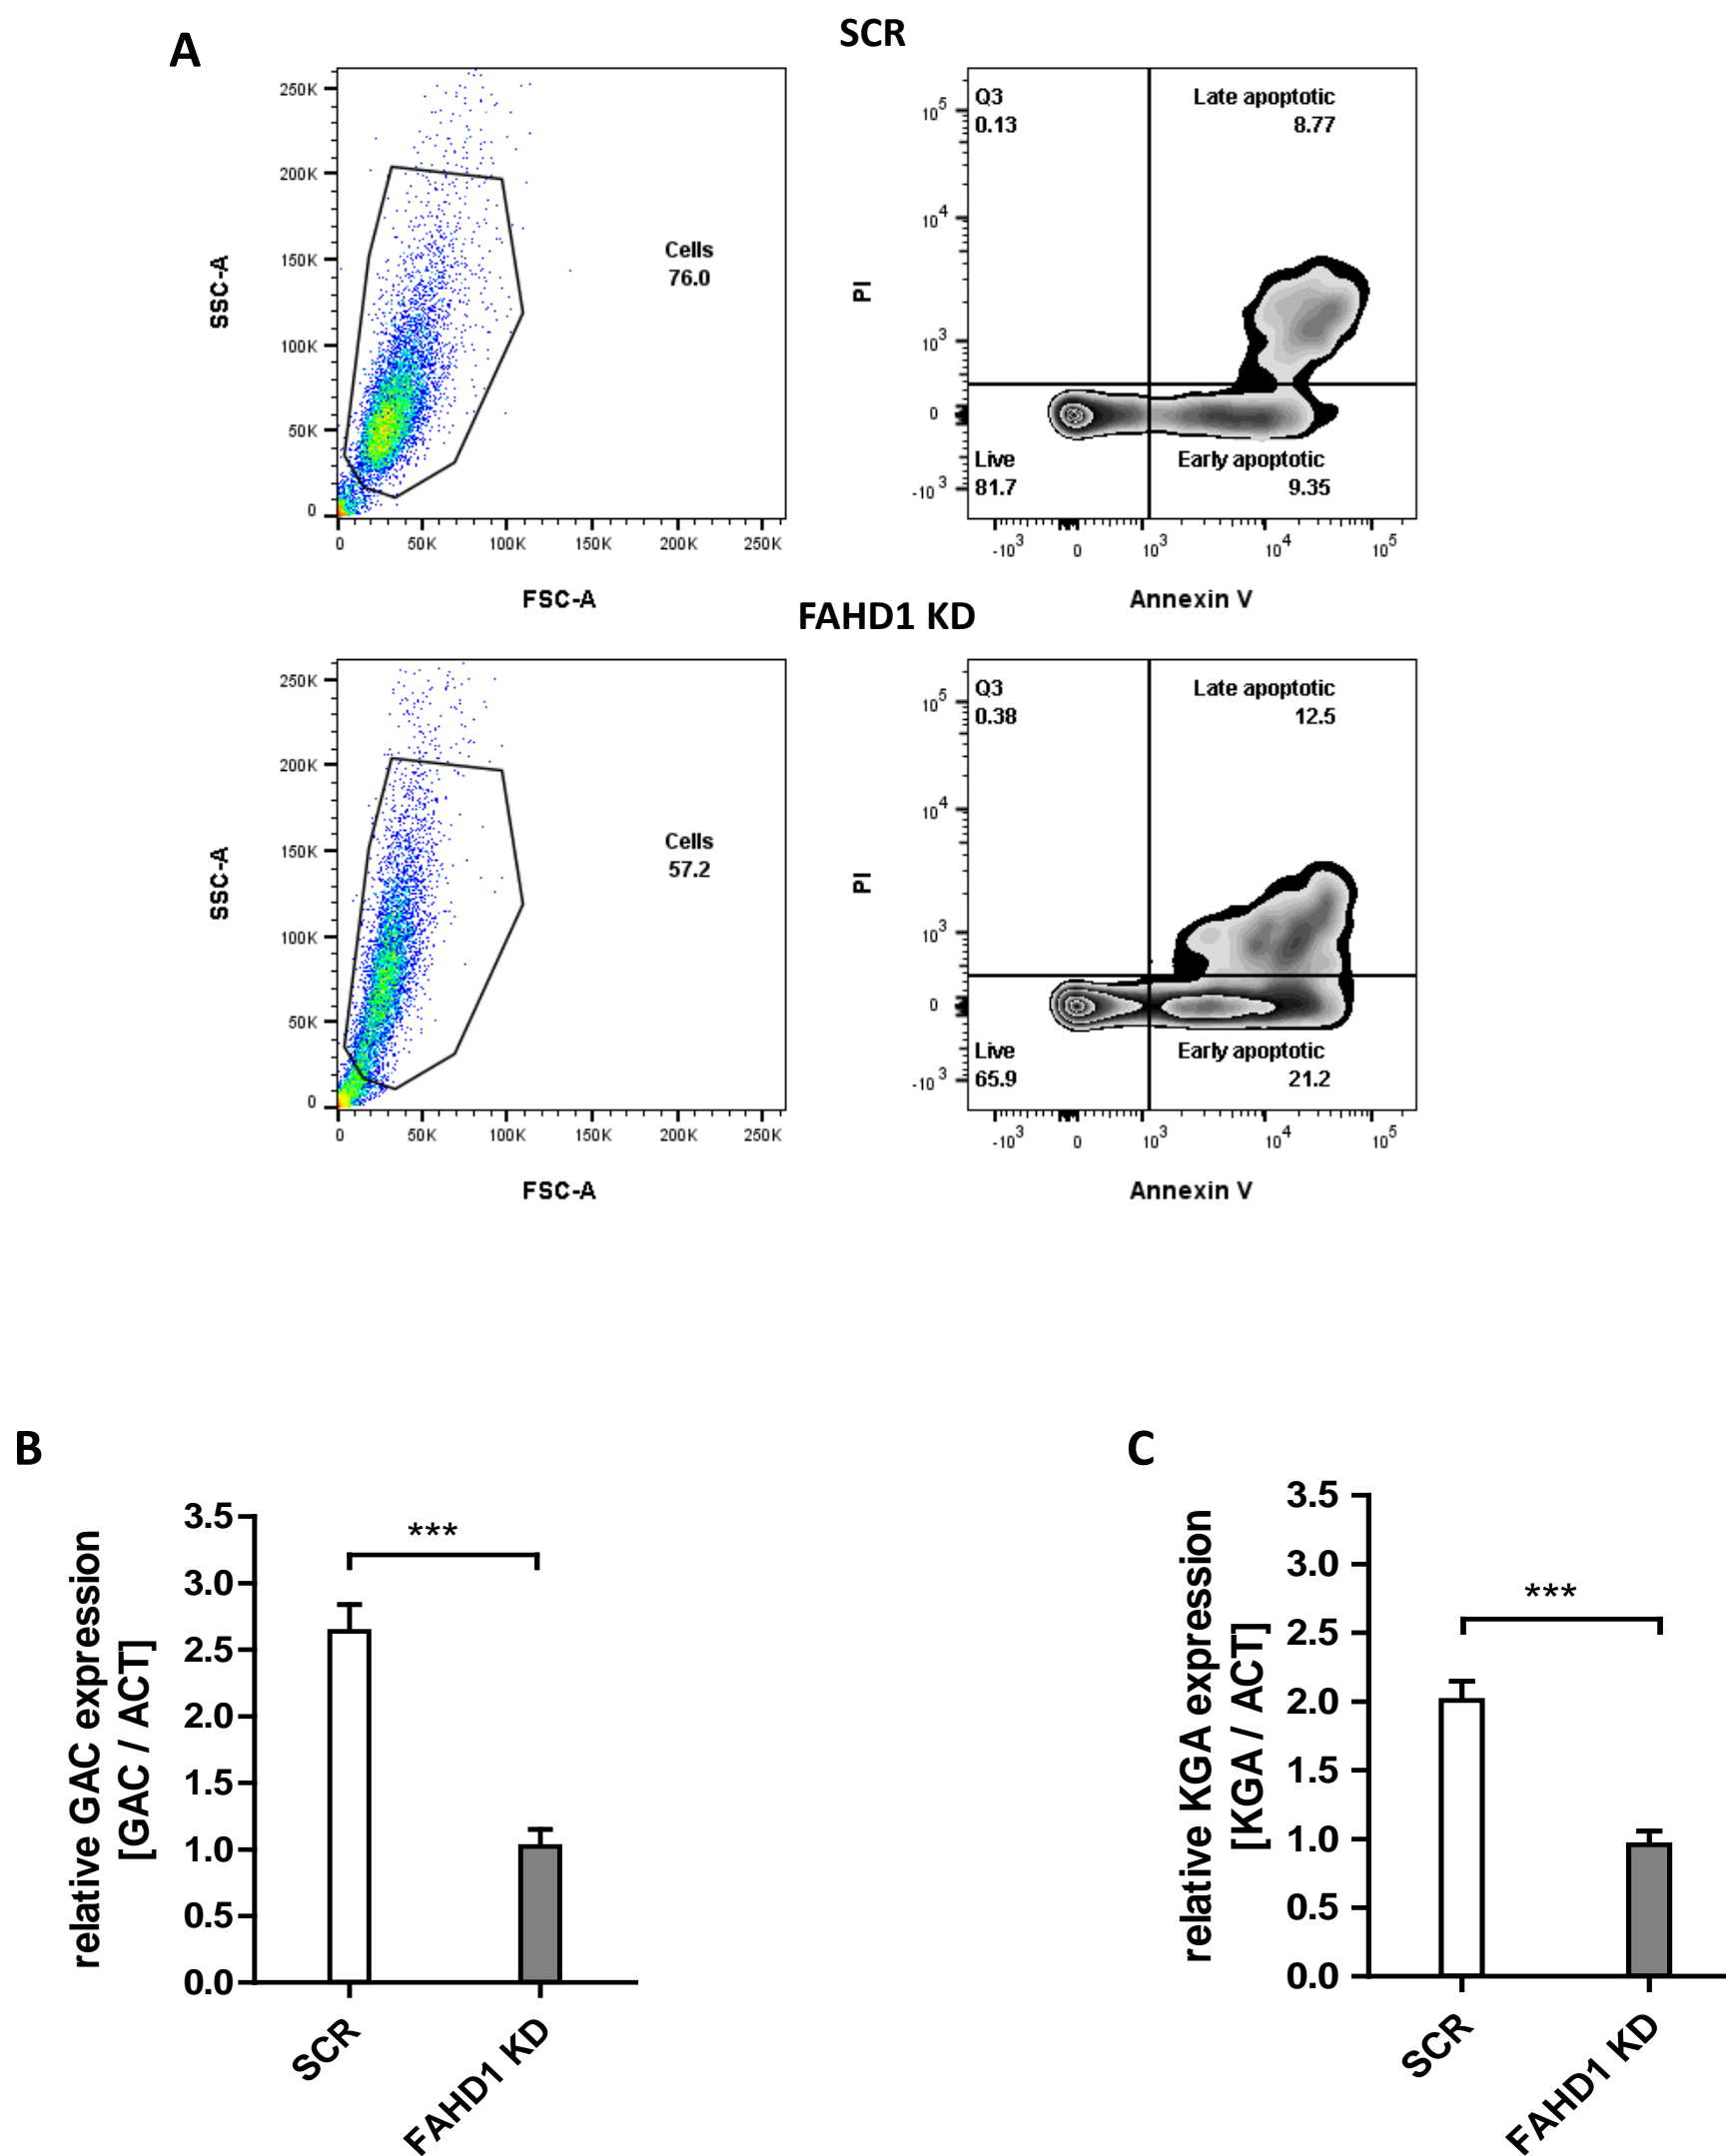

### Supplementary Figure 4 – Part 1. Cell death and expression of GLS in FAHD1 KD BT-20 cells

**A)** Gating strategy for flow-cytometric evaluation of apoptosis in basal BT-20 cells. Representative figure for day 7 post infection. Percentages of Annexin V+ cells (early apoptotic) from the living cell population (SSC-A/FSC-A) where obtained from  $n = 3$  biological replicates of each control (SCR) and FAHD1 KD cells. **B)** Evaluation of GLS isoform GAC expression and **C)** KGA expression in BT-20 cells upon FAHD1 KD. Mean of  $n = 8$  biological replicates with SEM, also see Figure 5E. **D)** Levels of mitochondrial phosphoenolpyruvate-carboxykinase (mPEPCK) were measured *via* western blot in SCR and FAHD1 KD BT-20 cells which were culture for 48 h in limiting conditions. **E)** Protein expression of succinate-dehydrogenase (Complex II, SDH) and NADH:ubiquinone-oxidoreductase (mitochondrial complex I, *NDUFA9*) were analyzed in SCR and FAHD1 KD BT-20 cells. Significance threshold for students t-test: \*  $p \leq 0.05$ ; \*\*  $p \leq 0.01$ ; \*\*\*  $p \leq 0.001$

## Supplementary Figure 4 – Part 2

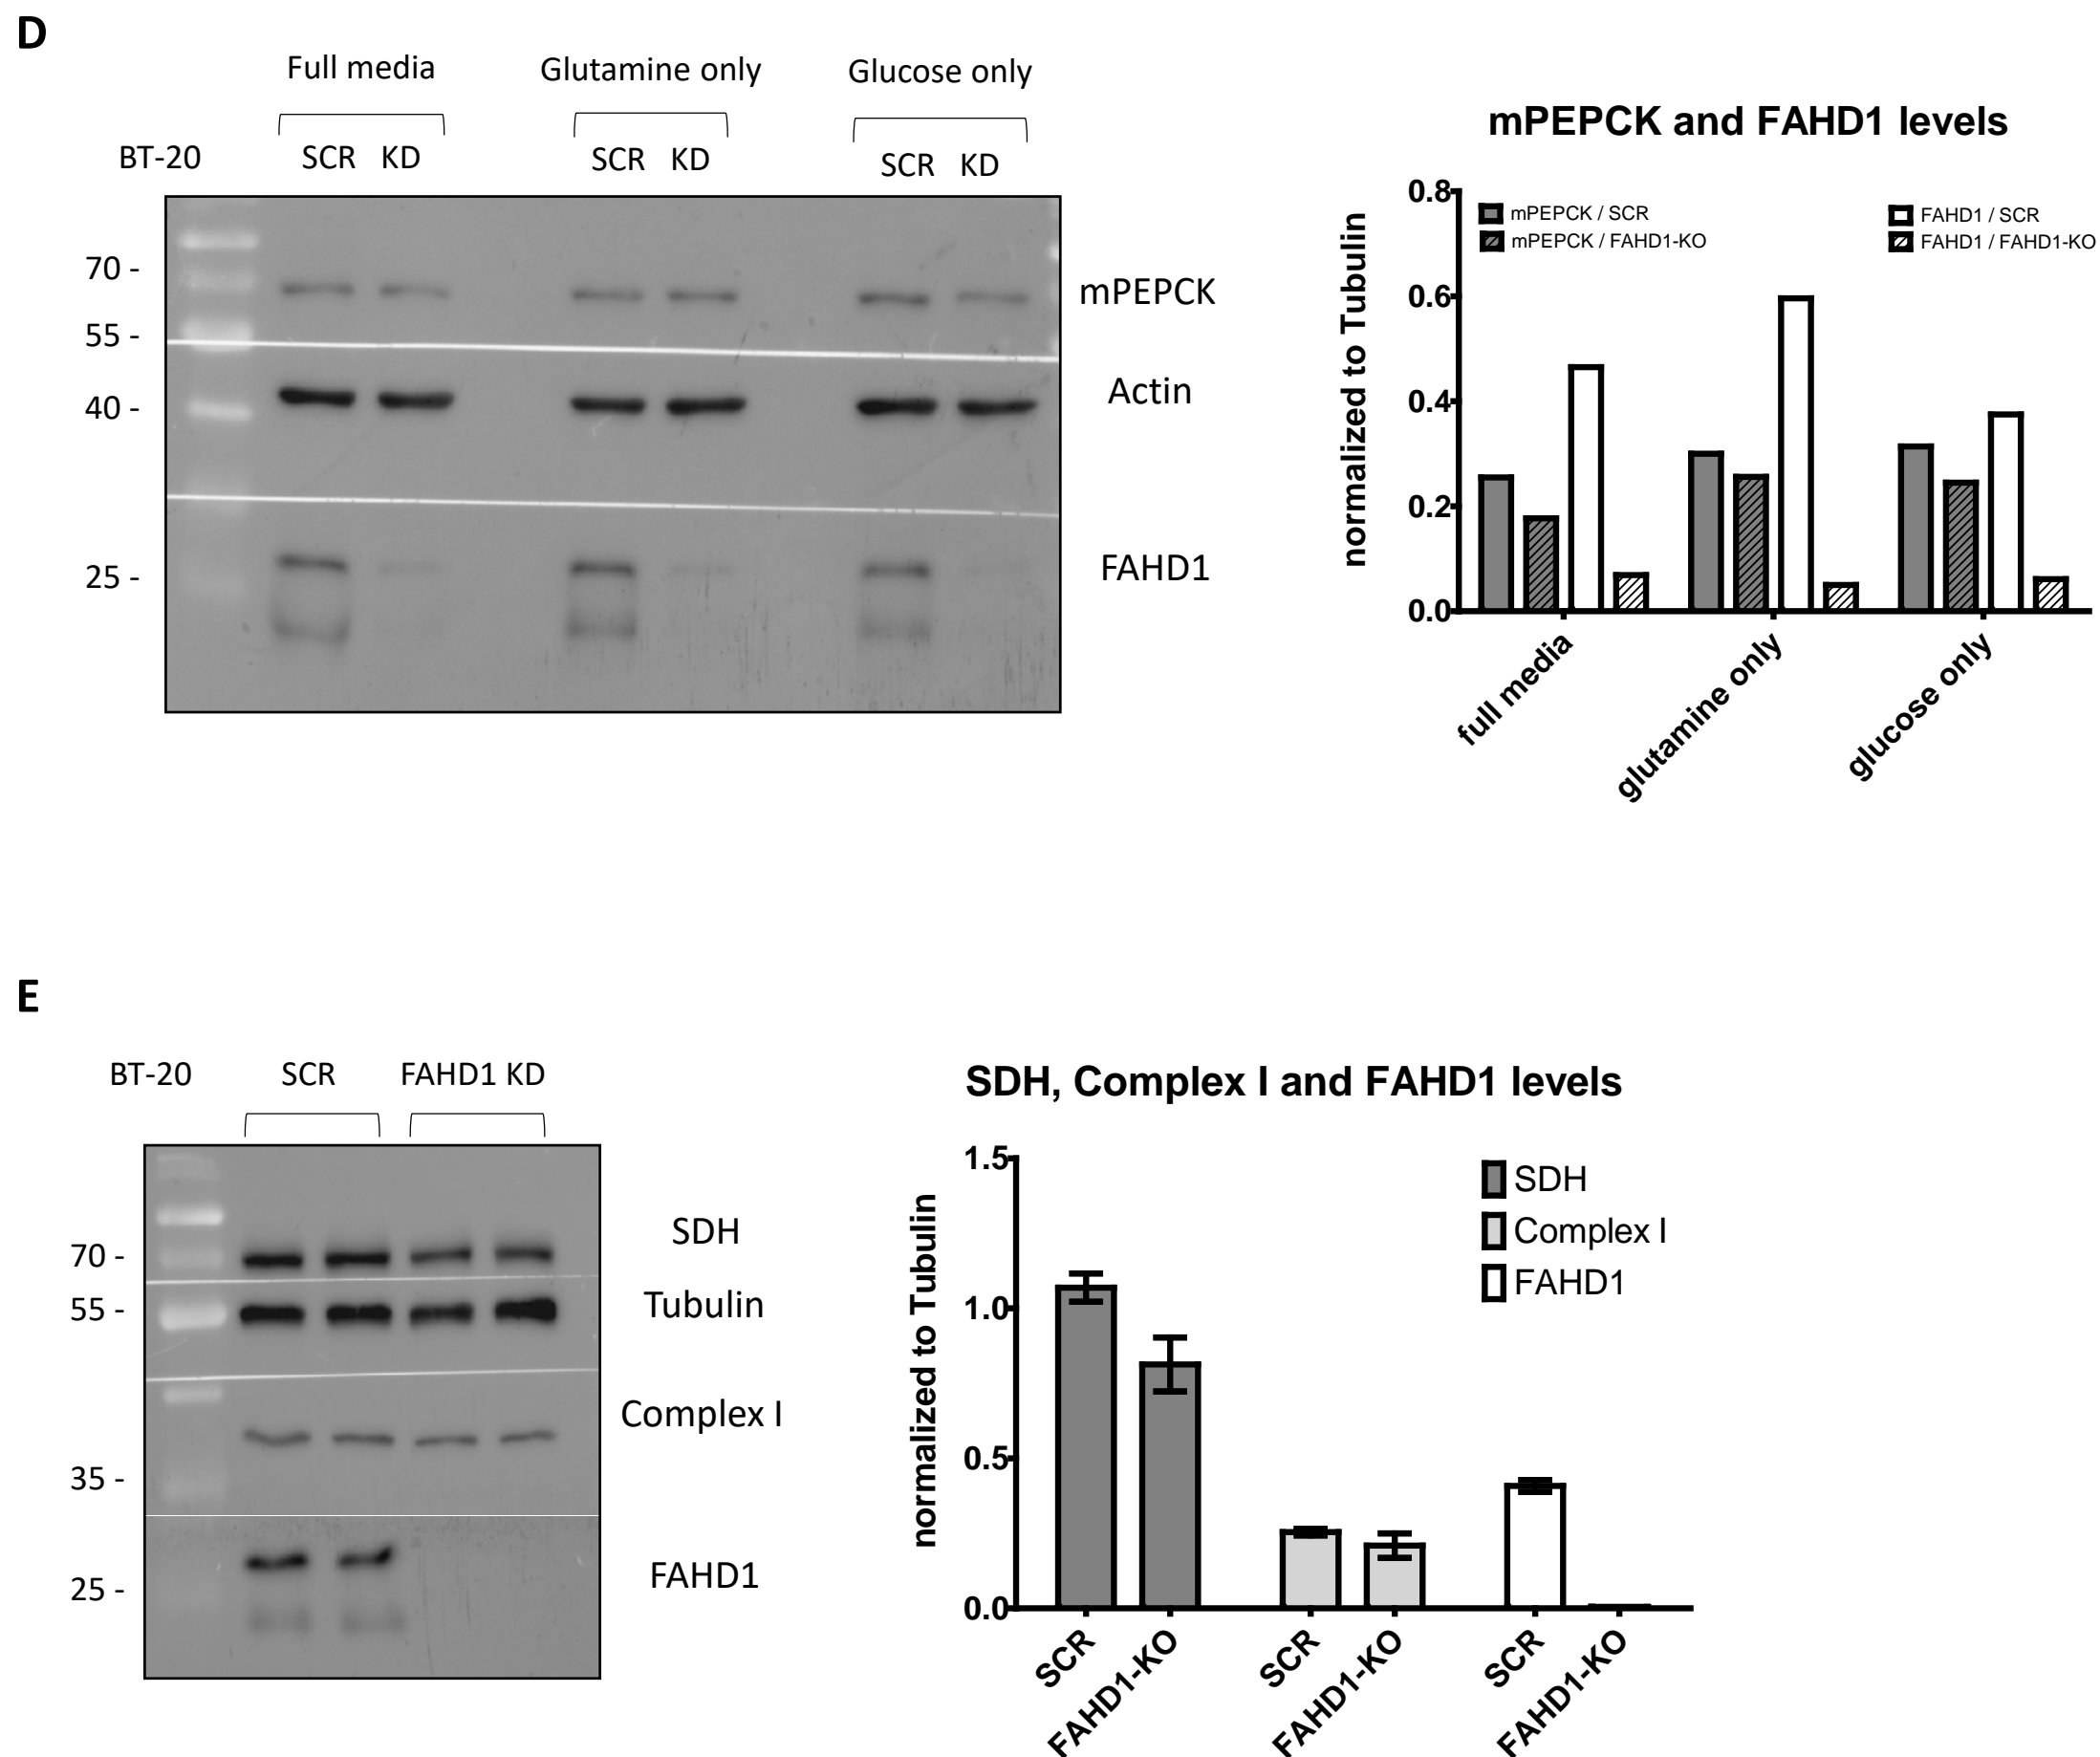

### Supplementary Figure 4 – Part 2. Cell death and expression of GLS in FAHD1 KD BT-20 cells

**A)** Gating strategy for flow-cytometric evaluation of apoptosis in basal BT-20 cells. Representative figure for day 7 post infection. Percentages of Annexin V+ cells (early apoptotic) from the living cell population (SSC-A/FSC-A) where obtained from  $n = 3$  biological replicates of each control (SCR) and FAHD1 KD cells. **B)** Evaluation of GLS isoform GAC expression and **C)** KGA expression in BT-20 cells upon FAHD1 KD. Mean of  $n = 8$  biological replicates with SEM, also see Figure 5E. **D)** Levels of mitochondrial phosphoenolpyruvate-carboxykinase (mPEPCK) were measured *via* western blot in SCR and FAHD1 KD BT-20 cells which were culture for 48 h in limiting conditions. **E)** Protein expression of succinate-dehydrogenase (Complex II, SDH) and NADH:ubiquinone-oxidoreductase (mitochondrial complex I, *NDUFA9*) were analyzed in SCR and FAHD1 KD BT-20 cells. Significance threshold for students t-test: \*  $p \leq 0.05$ ; \*\*  $p \leq 0.01$ ; \*\*\*  $p \leq 0.001$
